# Supplementary material for: The CB1 receptor interacts with cereblon and drives cereblon deficiency-associated memory shortfalls
Source: PubMed Central journal article supplement (PMC11018632; doi:10.1038/s44321-024-00054-w), 2024-03-21
Supplement: 44321_2024_54_MOESM1_ESM.pdf [file 44321_2024_54_MOESM1_ESM.pdf]

## APPENDIX

### The CB<sub>1</sub> receptor interacts with cereblon and drives cereblon deficiency-associated memory shortfalls

Carlos Costas-Insua<sup>1,2,3,#</sup>, Alba Hermoso-López<sup>1,2,3,#</sup>, Estefanía Moreno<sup>4,§</sup>,  
Carlos Montero-Fernández<sup>1,2,3,§</sup>, Alicia Álvaro-Blázquez<sup>1,3</sup>, Irene B. Maroto<sup>1,2,3</sup>,  
Andrea Sánchez-Ruiz<sup>5</sup>, Rebeca Diez-Alarcia<sup>6,7,8</sup>, Cristina Blázquez<sup>1,2,3</sup>, Paula Morales<sup>9</sup>,  
Enric I. Canela<sup>4</sup>, Vicent Casadó<sup>4</sup>, Leyre Urigüen<sup>6,7,8</sup>, Gertrudis Perea<sup>5</sup>,  
Luigi Bellocchio<sup>10</sup>, Ignacio Rodríguez-Crespo<sup>1,2,3</sup>, Manuel Guzmán<sup>1,2,3,\*</sup>

<sup>1</sup>Department of Biochemistry and Molecular Biology, Instituto Universitario de Investigación Neuroquímica (IUIIN), Complutense University, 28040 Madrid, Spain.

<sup>2</sup>Centro de Investigación Biomédica en Red de Enfermedades Neurodegenerativas (CIBERNED), Instituto de Salud Carlos III, 28029 Madrid, Spain.

<sup>3</sup>Instituto Ramón y Cajal de Investigación Sanitaria (IRYCIS), 28034 Madrid, Spain.

<sup>4</sup>Department of Biochemistry and Molecular Biomedicine, Faculty of Biology and Institute of Biomedicine of the University of Barcelona, University of Barcelona, 08028 Barcelona, Spain.

<sup>5</sup>Cajal Institute, CSIC, 28002 Madrid, Spain.

<sup>6</sup>Department of Pharmacology, University of the Basque Country/Euskal Herriko Unibertsitatea, 48940 Leioa, Spain.

<sup>7</sup>Centro de Investigación Biomédica en Red de Salud Mental (CIBERSAM), 28029 Madrid, Spain.

<sup>8</sup>BioBizkaia Health Research Institute, 48903 Barakaldo, Bizkaia, Spain.

<sup>9</sup>Instituto de Química Médica, CSIC, 28006 Madrid, Spain.

<sup>10</sup>Institut National de la Santé et de la Recherche Médicale (INSERM) and University of Bordeaux, NeuroCentre Magendie, Physiopathologie de la Plasticité Neuronale, U1215, 33077 Bordeaux, France.

#Contributed equally as first authors

§Contributed equally as third authors

\*Corresponding author

### Table of contents

1. Appendix Table S1

Statistical analysis of potential sex differences in the behavioural tests.....2

**CRBN-KO vs. CRBN-WT**

| Figure 2<br>Behavioural test                                | CRBN-WT                 |                         | p (Males vs. Females) | CRBN-KO                 |                         | p (Males vs. Females) |
|-------------------------------------------------------------|-------------------------|-------------------------|-----------------------|-------------------------|-------------------------|-----------------------|
|                                                             | Males mean ± SEM        | Females mean ± SEM      |                       | Males mean ± SEM        | Females mean ± SEM      |                       |
| Body weight (g)                                             | 21.93 ± 0.9563 (n = 12) | 19.26 ± 0.3352 (n = 12) | p = 0.0252            | 21.91 ± 0.5847 (n = 12) | 19.08 ± 0.5152 (n = 12) | p = 0.0160            |
| Body temperature (°C)                                       | 35.62 ± 0.3441 (n = 10) | 36.37 ± 0.3004 (n = 10) | p = 0.2459            | 35.80 ± 0.2413 (n = 10) | 35.82 ± 0.2112 (n = 10) | p > 0.9999            |
| Total distance in open field (m)                            | 62.75 ± 4.187 (n = 9)   | 70.59 ± 5.270 (n = 9)   | p = 0.6463            | 66.68 ± 5.920 (n = 8)   | 66.41 ± 3.710 (n = 7)   | p > 0.9999            |
| Latency to fall from rotarod (s)                            | 79.22 ± 20.38 (n = 9)   | 75.24 ± 13.84 (n = 9)   | p > 0.9999            | 87.61 ± 13.90 (n = 9)   | 92.92 ± 27.22 (n = 6)   | p = 0.6367            |
| Time in open arms of EPM (%)                                | 3.419 ± 1.132 (n = 7)   | 4.157 ± 0.8967 (n = 6)  | p = 0.9391            | 2.318 ± 0.5576 (n = 6)  | 3.638 ± 1.000 (n = 5)   | p = 0.7835            |
| Time sniffing the object in the social interaction maze (s) | 416.8 ± 55.36 (n = 5)   | 416.5 ± 61.12 (n = 6)   | p > 0.9999            | 470.6 ± 55.19 (n = 7)   | 476.7 ± 133.7 (n = 3)   | p > 0.9999            |
| Time sniffing the mouse in the social interaction maze (s)  | 1300 ± 68.94 (n = 5)    | 1449 ± 44.06 (n = 6)    | p = 0.7766            | 1243 ± 144.5 (n = 7)    | 1297 ± 124.4 (n = 3)    | p = 0.9903            |
| Immobility time during FST (s)                              | 151.3 ± 9.162 (n = 7)   | 150.2 ± 13.17 (n = 5)   | p > 0.9999            | 139.0 ± 20.36 (n = 7)   | 149.4 ± 32.74 (n = 3)   | p = 0.9832            |
| Discrimination index in NOR (%)                             | 0.1667 ± 0.057 (n = 6)  | 0.2108 ± 0.0415 (n = 6) | p = 0.9198            | 0.080 ± 0.020 (n = 8)   | 0.002 ± 0.070 (n = 6)   | p = 0.6347            |
| Distance in the familiar arm in spatial Y-maze (m)          | 6.055 ± 0.4568 (n = 18) | 4.923 ± 0.2978 (n = 8)  | p = 0.5290            | 7.024 ± 0.6144 (n = 14) | 6.144 ± 0.8007 (n = 7)  | p = 0.7658            |
| Distance in the novel arm in spatial Y-maze (m)             | 6.908 ± 0.4388 (n = 18) | 7.311 ± 0.9454 (n = 8)  | p = 0.9653            | 7.358 ± 0.4945 (n = 14) | 6.706 ± 0.7235 (n = 7)  | p = 0.8975            |
| Freezing time in day 2 of FC (%)                            | 31.09 ± 7.439 (n = 5)   | 26.06 ± 5.681 (n = 5)   | p = 0.9077            | 13.41 ± 5.240 (n = 3)   | 18.07 ± 2.915 (n = 7)   | p = 0.9405            |

| Figure EV2<br>Behavioural test                     | CRBN-WT                |                        | p (Males vs. Females) | CRBN-KO                |                        | p (Males vs. Females) |
|----------------------------------------------------|------------------------|------------------------|-----------------------|------------------------|------------------------|-----------------------|
|                                                    | Males mean ± SEM       | Females mean ± SEM     |                       | Males mean ± SEM       | Females mean ± SEM     |                       |
| Stride length (cm)                                 | 6.364 ± 0.1407 (n = 7) | 6.628 ± 0.2159 (n = 6) | p = 0.7313            | 6.787 ± 0.1983 (n = 6) | 5.934 ± 0.2625 (n = 2) | p = 0.1400            |
| Normalized entries in centre in open field         | 0.3248 ± 0.039 (n = 9) | 0.2504 ± 0.050 (n = 9) | p = 0.5192            | 0.2978 ± 0.029 (n = 9) | 0.2572 ± 0.031 (n = 6) | p = 0.9059            |
| Latency to pain symptoms in the hot plate test (s) | 18.48 ± 2.599 (n = 9)  | 19.96 ± 2.341 (n = 9)  | p = 0.9548            | 18.23 ± 1.294 (n = 9)  | 17.35 ± 1.562 (n = 6)  | p = 0.9925            |
| Freezing time in day 1 of FC (%)                   | 28.77 ± 7.018 (n = 5)  | 32.44 ± 4.277 (n = 5)  | p = 0.9730            | 24.91 ± 9.529 (n = 3)  | 29.84 ± 5.034 (n = 7)  | p = 0.9518            |
| Latency to fall from rotarod day 1 (s)             | 32.93 ± 8.93 (n = 9)   | 29.07 ± 4.59 (n = 9)   | p = 0.9881            | 36.44 ± 12.29 (n = 9)  | 22.72 ± 3.80 (n = 6)   | p = 0.7342            |
| Latency to fall from rotarod day 2 (s)             | 65.67 ± 21.19 (n = 9)  | 53.48 ± 9.82 (n = 9)   | p = 0.9765            | 77.04 ± 28.92 (n = 9)  | 81.44 ± 23.37 (n = 6)  | p = 0.9992            |
| Latency to fall from rotarod day 3 (s)             | 92.78 ± 20.84 (n = 9)  | 97.00 ± 18.68 (n = 9)  | p = 0.9991            | 98.19 ± 24.85 (n = 9)  | 104.4 ± 31.50 (n = 6)  | p = 0.9980            |

| Figure 5<br>Behavioural test                                 | CRBN-WT + Vehicle      |                       | p (Males vs. Females) | CRBN-WT + THC          |                       | p (Males vs. Females) |
|--------------------------------------------------------------|------------------------|-----------------------|-----------------------|------------------------|-----------------------|-----------------------|
|                                                              | Males mean ± SEM       | Females mean ± SEM    |                       | Males mean ± SEM       | Females mean ± SEM    |                       |
| Time immobile in the catalepsy test (3 mg/kg; s)             | 2.900 ± 0.781 (n = 10) | 3.000 ± 1.309 (n = 7) | p > 0.9999            | 3.182 ± 1.292 (n = 11) | 4.600 ± 1.887 (n = 5) | p = 0.9961            |
| Latency to pain symptoms in the hot plate test (3 mg/kg; s)  | 14.31 ± 1.693 (n = 10) | 16.64 ± 2.215 (n = 7) | p = 0.9081            | 19.05 ± 1.950 (n = 11) | 17.88 ± 4.140 (n = 5) | p = 0.9945            |
| Time immobile in the catalepsy test (10 mg/kg; s)            | 1.400 ± 0.872 (n = 5)  | 2.250 ± 2.250 (n = 4) | p > 0.9999            | 34.80 ± 10.31 (n = 5)  | 40.00 ± 20.00 (n = 2) | p = 0.9862            |
| Latency to pain symptoms in the hot plate test (10 mg/kg; s) | 13.33 ± 2.043 (n = 4)  | 16.63 ± 1.120 (n = 4) | p = 0.7959            | 20.55 ± 1.433 (n = 4)  | 28.00 ± 2.000 (n = 2) | p = 0.2773            |

| Behavioural test                                             | CRBN-KO + Vehicle     |                        | p (Males vs. Females) | CRBN-KO + THC         |                        | p (Males vs. Females) |
|--------------------------------------------------------------|-----------------------|------------------------|-----------------------|-----------------------|------------------------|-----------------------|
|                                                              | Males mean ± SEM      | Females mean ± SEM     |                       | Males mean ± SEM      | Females mean ± SEM     |                       |
| Time immobile in the catalepsy test (3 mg/kg; s)             | 2.333 ± 0.615 (n = 6) | 2.833 ± 0.757 (n = 12) | p > 0.9999            | 11.86 ± 4.718 (n = 7) | 14.91 ± 4.988 (n = 11) | p = 0.7662            |
| Latency to pain symptoms in the hot plate test (3 mg/kg; s)  | 16.97 ± 1.063 (n = 6) | 18.41 ± 1.111 (n = 12) | p = 0.9840            | 19.61 ± 3.228 (n = 7) | 22.40 ± 2.130 (n = 11) | p = 0.8299            |
| Time immobile in the catalepsy test (10 mg/kg; s)            | 4.750 ± 1.436 (n = 4) | 10.00 ± 3.688 (n = 5)  | p = 0.9680            | 57.50 ± 2.500 (n = 4) | 51.00 ± 9.000 (n = 5)  | p = 0.9327            |
| Latency to pain symptoms in the hot plate test (10 mg/kg; s) | 15.08 ± 2.362 (n = 4) | 18.84 ± 3.285 (n = 5)  | p = 0.6688            | 28.28 ± 1.725 (n = 4) | 27.68 ± 2.320 (n = 5)  | p = 0.9995            |

| Figure 6<br>Behavioural test                       | CRBN-WT + Vehicle      |                        | p (Males vs. Females) | CRBN-WT + Rimo         |                        | p (Males vs. Females) |
|----------------------------------------------------|------------------------|------------------------|-----------------------|------------------------|------------------------|-----------------------|
|                                                    | Males mean ± SEM       | Females mean ± SEM     |                       | Males mean ± SEM       | Females mean ± SEM     |                       |
| Discrimination index in NOR (%)                    | 0.1750 ± 0.088 (n = 4) | 0.2570 ± 0.049 (n = 7) | p = 0.7966            | 0.1802 ± 0.049 (n = 5) | 0.1626 ± 0.024 (n = 4) | p = 0.9994            |
| Freezing time in day 2 of FC (%)                   | 41.26 ± 6.205 (n = 8)  | 32.14 ± 5.538 (n = 9)  | p = 0.6953            | 32.69 ± 7.173 (n = 5)  | 22.19 ± 4.414 (n = 6)  | p = 0.7529            |
| Distance in the familiar arm in spatial Y-maze (m) | 3.482 ± 0.624 (n = 4)  | 4.859 ± 0.661 (n = 7)  | p = 0.3560            | 6.323 ± 0.578 (n = 4)  | 6.246 ± 0.217 (n = 5)  | p > 0.9999            |
| Distance in the novel arm in spatial Y-maze (m)    | 5.138 ± 0.527 (n = 4)  | 8.554 ± 0.907 (n = 7)  | p = 0.0048            | 7.048 ± 0.120 (n = 4)  | 9.919 ± 0.732 (n = 5)  | p = 0.0344            |

| Behavioural test                                   | CRBN-KO + Vehicle     |                       | p (Males vs. Females) | CRBN-KO + Rimo         |                        | p (Males vs. Females) |
|----------------------------------------------------|-----------------------|-----------------------|-----------------------|------------------------|------------------------|-----------------------|
|                                                    | Males mean ± SEM      | Females mean ± SEM    |                       | Males mean ± SEM       | Females mean ± SEM     |                       |
| Discrimination index in NOR (%)                    | 0.034 ± 0.100 (n = 4) | 0.061 ± 0.055 (n = 7) | p = 0.9960            | 0.2239 ± 0.054 (n = 4) | 0.2003 ± 0.036 (n = 5) | p = 0.9981            |
| Freezing time in day 2 of FC (%)                   | 19.11 ± 5.464 (n = 7) | 13.51 ± 3.675 (n = 5) | p = 0.9630            | 42.97 ± 2.250 (n = 2)  | 47.58 ± 12.00 (n = 5)  | p = 0.9953            |
| Distance in the familiar arm in spatial Y-maze (m) | 5.219 ± 0.533 (n = 6) | 6.954 ± 0.545 (n = 7) | p = 0.0917            | 4.461 ± 0.529 (n = 4)  | 4.183 ± 0.692 (n = 3)  | p = 0.9978            |
| Distance in the novel arm in spatial Y-maze (m)    | 5.856 ± 0.472 (n = 6) | 5.665 ± 0.650 (n = 7) | p = 0.9991            | 6.126 ± 0.177 (n = 4)  | 7.384 ± 0.498 (n = 3)  | p = 0.7461            |

p values were obtained by one-way ANOVA with Tukey's post-hoc test (Figs 2 and EV2) or by two-way ANOVA with Sidak's post-hoc test (Figs 5 and 6)

**Glu-CRBN-KO vs. CRBN-WT**

| Figure 2                                                    | Glu-CRBN-WT             |                         | p (Males vs. Females) | Glu-CRBN-KO             |                         | p (Males vs. Females) |
|-------------------------------------------------------------|-------------------------|-------------------------|-----------------------|-------------------------|-------------------------|-----------------------|
|                                                             | Behavioural test        | Males mean ± SEM        |                       | Females mean ± SEM      | Males mean ± SEM        |                       |
| Body weight (g)                                             | 23.81 ± 0.8411 (n = 12) | 18.15 ± 0.7517 (n = 12) | p < 0.0001            | 21.72 ± 0.9065 (n = 12) | 18.33 ± 0.5092 (n = 12) | p = 0.0160            |
| Body temperature (°C)                                       | 36.65 ± 0.1797 (n = 10) | 36.25 ± 0.2701 (n = 10) | p = 0.5905            | 35.77 ± 0.2290 (n = 10) | 36.47 ± 0.2055 (n = 10) | p = 0.1387            |
| Total distance in open field (m)                            | 59.90 ± 4.185 (n = 11)  | 63.38 ± 3.475 (n = 11)  | p = 0.9257            | 55.11 ± 3.329 (n = 13)  | 65.96 ± 4.186 (n = 10)  | p = 0.1829            |
| Latency to fall from rotarod (s)                            | 122.15 ± 20.48 (n = 11) | 124.50 ± 21.57 (n = 9)  | p = 0.9740            | 136.65 ± 15.50 (n = 14) | 127.40 ± 21.90 (n = 10) | p = 0.9982            |
| Time in open arms of EPM (%)                                | 4.285 ± 1.275 (n = 8)   | 4.584 ± 1.443 (n = 11)  | p = 0.9977            | 3.069 ± 0.6448 (n = 13) | 1.854 ± 0.7958 (n = 5)  | p = 0.9094            |
| Time sniffing the object in the social interaction maze (s) | 527.8 ± 84.50 (n = 11)  | 562.3 ± 99.74 (n = 11)  | p = 0.9925            | 452.4 ± 72.33 (n = 14)  | 637.8 ± 119.0 (n = 6)   | p = 0.5696            |
| Time sniffing the mouse in the social interaction maze (s)  | 1051 ± 125.2 (n = 11)   | 937.4 ± 80.38 (n = 11)  | p = 0.9162            | 1023 ± 136.5 (n = 14)   | 1139 ± 144.9 (n = 6)    | p = 0.9383            |
| Immobility time during FST (s)                              | 144.7 ± 8.020 (n = 11)  | 143.9 ± 14.40 (n = 11)  | p > 0.9999            | 140.5 ± 7.901 (n = 14)  | 129.6 ± 19.26 (n = 6)   | p = 0.9311            |
| Discrimination index in NOR (%)                             | 0.2162 ± 0.041 (n = 10) | 0.1748 ± 0.046 (n = 7)  | p = 0.9592            | 0.056 ± 0.060 (n = 12)  | 0.049 ± 0.1200 (n = 3)  | p > 0.9999            |
| Distance in the familiar arm in spatial Y-maze (m)          | 5.550 ± 0.5271 (n = 13) | 4.885 ± 0.4407 (n = 19) | p = 0.7759            | 5.726 ± 0.5364 (n = 14) | 6.408 ± 0.5131 (n = 14) | p = 0.7884            |
| Distance in the novel arm in spatial Y-maze (m)             | 6.873 ± 0.5750 (n = 13) | 6.864 ± 0.4551 (n = 19) | p > 0.9999            | 5.910 ± 0.5171 (n = 14) | 6.647 ± 0.3785 (n = 14) | p = 0.7274            |
| Freezing time in day 2 of FC (%)                            | 21.24 ± 2.904 (n = 12)  | 21.42 ± 2.783 (n = 12)  | p > 0.9999            | 7.736 ± 2.524 (n = 12)  | 6.500 ± 1.923 (n = 12)  | p = 0.9861            |

| Figure EV2                                         | Glu-CRBN-WT             |                         | p (Males vs. Females) | Glu-CRBN-KO             |                        | p (Males vs. Females) |
|----------------------------------------------------|-------------------------|-------------------------|-----------------------|-------------------------|------------------------|-----------------------|
|                                                    | Behavioural test        | Males mean ± SEM        |                       | Females mean ± SEM      | Males mean ± SEM       |                       |
| Stride length (cm)                                 | 6.581 ± 0.1629 (n = 7)  | 6.034 ± 0.2157 (n = 10) | p = 0.4564            | 6.497 ± 0.2225 (n = 10) | 5.848 ± 0.8805 (n = 3) | p = 0.5564            |
| Normalized entries in centre in open field         | 0.2172 ± 0.022 (n = 11) | 0.2860 ± 0.022 (n = 9)  | p = 0.2182            | 0.2209 ± 0.022 (n = 13) | 0.1955 ± 0.038 (n = 6) | p = 0.9102            |
| Latency to pain symptoms in the hot plate test (s) | 16.66 ± 2.182 (n = 10)  | 18.31 ± 1.627 (n = 10)  | p = 0.9275            | 14.62 ± 1.818 (n = 14)  | 13.88 ± 0.3720 (n = 5) | p = 0.9953            |
| Freezing time in day 1 of FC (%)                   | 20.04 ± 2.107 (n = 12)  | 24.48 ± 2.144 (n = 12)  | p = 0.6742            | 18.62 ± 2.329 (n = 12)  | 20.34 ± 4.063 (n = 12) | p = 0.9718            |
| Latency to fall from rotarod day 1 (s)             | 60.61 ± 11.58 (n = 11)  | 70.48 ± 18.03 (n = 9)   | p = 0.9745            | 67.93 ± 16.92 (n = 14)  | 62.30 ± 14.37 (n = 10) | p = 0.9937            |
| Latency to fall from rotarod day 2 (s)             | 113.1 ± 21.21 (n = 11)  | 105.4 ± 19.54 (n = 9)   | p = 0.9939            | 130.2 ± 15.78 (n = 14)  | 109.8 ± 25.21 (n = 10) | p = 0.8827            |
| Latency to fall from rotarod day 3 (s)             | 131.2 ± 20.91 (n = 11)  | 143.6 ± 25.45 (n = 9)   | p = 0.9782            | 143.1 ± 18.13 (n = 14)  | 145.0 ± 20.60 (n = 10) | p > 0.9999            |

| Figure 5                                                     | Glu-CRBN-WT + Vehicle |                       | p (Males vs. Females) | Glu-CRBN-WT + THC     |                       | p (Males vs. Females) |
|--------------------------------------------------------------|-----------------------|-----------------------|-----------------------|-----------------------|-----------------------|-----------------------|
|                                                              | Behavioural test      | Males mean ± SEM      |                       | Females mean ± SEM    | Males mean ± SEM      |                       |
| Time immobile in the catalepsy test (3 mg/kg; s)             | 2.857 ± 1.844 (n = 7) | 1.875 ± 0.549 (n = 8) | p = 0.9950            | 2.375 ± 1.149 (n = 8) | 3.167 ± 0.910 (n = 6) | p = 0.9982            |
| Latency to pain symptoms in the hot plate test (3 mg/kg; s)  | 11.90 ± 1.831 (n = 7) | 10.24 ± 1.489 (n = 8) | p = 0.9599            | 15.03 ± 1.540 (n = 8) | 14.10 ± 2.863 (n = 6) | p = 0.9962            |
| Time immobile in the catalepsy test (10 mg/kg; s)            | 0.500 ± 0.500 (n = 4) | 3.000 ± 1.732 (n = 3) | p = 0.9995            | 48.00 ± 12.00 (n = 5) | 29.67 ± 7.753 (n = 3) | p = 0.5031            |
| Latency to pain symptoms in the hot plate test (10 mg/kg; s) | 14.55 ± 1.333 (n = 4) | 13.57 ± 7.269 (n = 3) | p = 0.9996            | 17.20 ± 3.041 (n = 5) | 25.97 ± 2.640 (n = 3) | p = 0.3792            |

|                                                              | Glu-CRBN-KO + Vehicle |                       | p (Males vs. Females) | Glu-CRBN-KO + THC     |                       | p (Males vs. Females) |
|--------------------------------------------------------------|-----------------------|-----------------------|-----------------------|-----------------------|-----------------------|-----------------------|
|                                                              | Behavioural test      | Males mean ± SEM      |                       | Females mean ± SEM    | Males mean ± SEM      |                       |
| Time immobile in the catalepsy test (3 mg/kg; s)             | 1.571 ± 0.812 (n = 7) | 1.714 ± 0.680 (n = 7) | p > 0.9999            | 13.71 ± 4.814 (n = 7) | 10.57 ± 2.379 (n = 7) | p = 0.7540            |
| Latency to pain symptoms in the hot plate test (3 mg/kg; s)  | 10.23 ± 1.304 (n = 7) | 12.29 ± 1.360 (n = 7) | p = 0.9253            | 14.89 ± 3.123 (n = 7) | 16.77 ± 2.244 (n = 7) | p = 0.9444            |
| Time immobile in the catalepsy test (10 mg/kg; s)            | 8.000 ± 3.941 (n = 6) | 4.500 ± 2.102 (n = 4) | p = 0.9965            | 46.33 ± 8.647 (n = 6) | 28.00 ± 17.44 (n = 3) | p = 0.4722            |
| Latency to pain symptoms in the hot plate test (10 mg/kg; s) | 11.03 ± 1.900 (n = 6) | 10.90 ± 1.744 (n = 4) | p > 0.9999            | 19.40 ± 4.664 (n = 6) | 26.77 ± 2.038 (n = 3) | p = 0.5155            |

| Figure 6                                           | Glu-CRBN-WT + Vehicle   |                         | p (Males vs. Females) | Glu-CRBN-WT + Rimo      |                         | p (Males vs. Females) |
|----------------------------------------------------|-------------------------|-------------------------|-----------------------|-------------------------|-------------------------|-----------------------|
|                                                    | Behavioural test        | Males mean ± SEM        |                       | Females mean ± SEM      | Males mean ± SEM        |                       |
| Discrimination index in NOR (%)                    | 0.1434 ± 0.037 (n = 13) | 0.1697 ± 0.031 (n = 13) | p = 0.9836            | 0.1401 ± 0.054 (n = 13) | 0.1868 ± 0.031 (n = 15) | p = 0.8646            |
| Freezing time in day 2 of FC (%)                   | 33.03 ± 7.774 (n = 7)   | 33.08 ± 10.30 (n = 5)   | p > 0.9999            | 34.60 ± 11.54 (n = 4)   | 26.60 ± 7.587 (n = 7)   | p = 0.9399            |
| Distance in the familiar arm in spatial Y-maze (m) | 3.711 ± 0.710 (n = 8)   | 4.646 ± 0.281 (n = 5)   | p = 0.7735            | 3.818 ± 0.677 (n = 6)   | 5.292 ± 0.291 (n = 4)   | p = 0.5029            |
| Distance in the novel arm in spatial Y-maze (m)    | 6.860 ± 0.773 (n = 8)   | 6.968 ± 1.023 (n = 5)   | p > 0.9999            | 6.325 ± 0.936 (n = 6)   | 7.046 ± 0.851 (n = 4)   | p = 0.9630            |

|                                                    | Glu-CRBN-KO + Vehicle   |                        | p (Males vs. Females) | Glu-CRBN-KO + Rimo      |                         | p (Males vs. Females) |
|----------------------------------------------------|-------------------------|------------------------|-----------------------|-------------------------|-------------------------|-----------------------|
|                                                    | Behavioural test        | Males mean ± SEM       |                       | Females mean ± SEM      | Males mean ± SEM        |                       |
| Discrimination index in NOR (%)                    | -0.018 ± 0.040 (n = 12) | 0.1095 ± 0.025 (n = 9) | p = 0.1770            | 0.1974 ± 0.040 (n = 12) | 0.1433 ± 0.050 (n = 13) | p = 0.8207            |
| Freezing time in day 2 of FC (%)                   | 10.42 ± 2.477 (n = 4)   | 9.267 ± 2.980 (n = 5)  | p > 0.9999            | 38.61 ± 3.517 (n = 4)   | 47.33 ± 9.078 (n = 7)   | p = 0.9196            |
| Distance in the familiar arm in spatial Y-maze (m) | 4.720 ± 0.820 (n = 5)   | 5.348 ± 0.727 (n = 7)  | p = 0.9402            | 4.349 ± 0.379 (n = 5)   | 5.189 ± 0.674 (n = 6)   | p = 0.8617            |
| Distance in the novel arm in spatial Y-maze (m)    | 6.738 ± 0.934 (n = 5)   | 6.268 ± 0.275 (n = 7)  | p = 0.9890            | 8.191 ± 0.433 (n = 5)   | 6.878 ± 0.900 (n = 6)   | p = 0.7042            |

p values were obtained by one-way ANOVA with Tukey's post-hoc test (Figs 2 and EV2) or by two-way ANOVA with Sidak's post-hoc test (Figs 5 and 6)

**GABA-CRBN-KO vs. CRBN-WT**

| Figure 2<br>Behavioural test                                | GABA-CRBN-WT            |                         | p (Males vs. Females) | GABA-CRBN-KO            |                         | p (Males vs. Females) |
|-------------------------------------------------------------|-------------------------|-------------------------|-----------------------|-------------------------|-------------------------|-----------------------|
|                                                             | Males mean ± SEM        | Females mean ± SEM      |                       | Males mean ± SEM        | Females mean ± SEM      |                       |
| Body weight (g)                                             | 20.80 ± 0.8965 (n = 12) | 17.44 ± 0.5790 (n = 12) | p = 0.0026            | 20.74 ± 0.4735 (n = 12) | 17.65 ± 0.4731 (n = 12) | p = 0.0062            |
| Body temperature (°C)                                       | 36.52 ± 0.1896 (n = 10) | 36.71 ± 0.3433 (n = 10) | p = 0.9663            | 36.94 ± 0.1543 (n = 10) | 36.56 ± 0.3964 (n = 10) | p = 0.7897            |
| Total distance in open field (m)                            | 60.76 ± 3.621 (n = 8)   | 60.48 ± 3.736 (n = 12)  | p > 0.9999            | 64.67 ± 2.464 (n = 9)   | 65.78 ± 1.683 (n = 12)  | p = 0.9936            |
| Latency to fall from rotarod (s)                            | 74.72 ± 16.23 (n = 10)  | 119.55 ± 14.80 (n = 14) | p = 0.2157            | 124.72 ± 24.42 (n = 10) | 87.07 ± 21.72 (n = 14)  | p = 0.5791            |
| Time in open arms of EPM (%)                                | 4.724 ± 1.690 (n = 7)   | 4.523 ± 1.254 (n = 12)  | p = 0.9997            | 5.954 ± 1.281 (n = 9)   | 8.354 ± 1.527 (n = 11)  | p = 0.6361            |
| Time sniffing the object in the social interaction maze (s) | 512.7 ± 36.24 (n = 3)   | 460.6 ± 42.84 (n = 8)   | p = 0.9118            | 464.0 ± 55.65 (n = 7)   | 451.4 ± 32.76 (n = 8)   | p = 0.9967            |
| Time sniffing the mouse in the social interaction maze (s)  | 953.7 ± 163.7 (n = 3)   | 1076 ± 68.38 (n = 8)    | p = 0.8949            | 1215 ± 122.5 (n = 7)    | 1045 ± 85.35 (n = 8)    | p = 0.5856            |
| Immobility time during FST (s)                              | 175.2 ± 16.34 (n = 3)   | 173.9 ± 7.247 (n = 8)   | p > 0.9999            | 151.5 ± 12.20 (n = 7)   | 159.2 ± 13.23 (n = 9)   | p = 0.9635            |
| Discrimination index in NOR (%)                             | 0.2326 ± 0.061 (n = 7)  | 0.1319 ± 0.080 (n = 6)  | p = 0.6428            | 0.090 ± 0.049 (n = 10)  | 0.1632 ± 0.034 (n = 8)  | p = 0.7417            |
| Distance in the familiar arm in spatial Y-maze (m)          | 5.793 ± 0.5823 (n = 11) | 5.626 ± 0.7138 (n = 9)  | p = 0.9978            | 4.535 ± 0.4874 (n = 11) | 6.160 ± 0.6797 (n = 12) | p = 0.2385            |
| Distance in the novel arm in spatial Y-maze (m)             | 7.853 ± 0.8075 (n = 11) | 8.005 ± 0.7279 (n = 9)  | p = 0.9992            | 7.868 ± 0.8726 (n = 11) | 6.967 ± 0.7497 (n = 12) | p = 0.8426            |
| Freezing time in day 2 of FC (%)                            | 20.71 ± 4.553 (n = 10)  | 28.26 ± 7.618 (n = 5)   | p = 0.9940            | 22.22 ± 4.663 (n = 8)   | 17.10 ± 3.188 (n = 9)   | p = 0.8584            |

| Figure EV2<br>Behavioural test                     | GABA-CRBN-WT           |                         | p (Males vs. Females) | GABA-CRBN-KO            |                         | p (Males vs. Females) |
|----------------------------------------------------|------------------------|-------------------------|-----------------------|-------------------------|-------------------------|-----------------------|
|                                                    | Males mean ± SEM       | Females mean ± SEM      |                       | Males mean ± SEM        | Females mean ± SEM      |                       |
| Stride length (cm)                                 | 6.436 ± 0.2938 (n = 2) | 5.942 ± 0.1434 (n = 7)  | p = 0.6528            | 6.116 ± 0.2812 (n = 3)  | 6.040 ± 0.2286 (n = 8)  | p = 0.9965            |
| Normalized entries in centre in open field         | 0.2763 ± 0.030 (n = 8) | 0.2458 ± 0.021 (n = 11) | p = 0.8341            | 0.2347 ± 0.019 (n = 10) | 0.2102 ± 0.024 (n = 14) | p = 0.8725            |
| Latency to pain symptoms in the hot plate test (s) | 17.42 ± 1.472 (n = 9)  | 17.50 ± 1.558 (n = 12)  | p > 0.9999            | 16.59 ± 1.882 (n = 10)  | 18.54 ± 1.615 (n = 14)  | p = 0.8330            |
| Freezing time in day 1 of FC (%)                   | 24.71 ± 2.852 (n = 10) | 32.49 ± 9.593 (n = 3)   | p = 0.6629            | 11.72 ± 1.570 (n = 5)   | 25.49 ± 3.896 (n = 9)   | p = 0.1048            |
| Latency to fall from rotarod day 1 (s)             | 46.57 ± 10.02 (n = 10) | 55.83 ± 12.05 (n = 14)  | p = 0.9326            | 41.20 ± 6.85 (n = 10)   | 36.48 ± 11.06 (n = 14)  | p = 0.9901            |
| Latency to fall from rotarod day 2 (s)             | 68.03 ± 18.13 (n = 10) | 107.5 ± 14.04 (n = 14)  | p = 0.4392            | 95.87 ± 17.86 (n = 10)  | 74.05 ± 21.06 (n = 14)  | p = 0.8371            |
| Latency to fall from rotarod day 3 (s)             | 81.40 ± 15.52 (n = 10) | 131.6 ± 16.54 (n = 14)  | p = 0.4211            | 153.6 ± 33.41 (n = 10)  | 100.1 ± 23.40 (n = 14)  | p = 0.3652            |

| Figure 5<br>Behavioural test                                 | GABA-CRBN-WT + Vehicle |                       | p (Males vs. Females) | GABA-CRBN-WT + THC    |                       | p (Males vs. Females) |
|--------------------------------------------------------------|------------------------|-----------------------|-----------------------|-----------------------|-----------------------|-----------------------|
|                                                              | Males mean ± SEM       | Females mean ± SEM    |                       | Males mean ± SEM      | Females mean ± SEM    |                       |
| Time immobile in the catalepsy test (3 mg/kg; s)             | 2.000 ± 2.000 (n = 3)  | 0.500 ± 0.500 (n = 4) | p = 0.9534            | 4.750 ± 1.702 (n = 4) | 2.500 ± 2.500 (n = 4) | p = 0.7840            |
| Latency to pain symptoms in the hot plate test (3 mg/kg; s)  | 17.53 ± 1.368 (n = 3)  | 15.43 ± 2.616 (n = 4) | p = 0.9107            | 20.53 ± 1.215 (n = 4) | 19.00 ± 1.942 (n = 4) | p = 0.9615            |
| Time immobile in the catalepsy test (10 mg/kg; s)            | 0.667 ± 0.667 (n = 3)  | 0.600 ± 0.600 (n = 5) | p > 0.9999            | 45.33 ± 14.67 (n = 3) | 60.00 ± 0.000 (n = 4) | p = 0.5507            |
| Latency to pain symptoms in the hot plate test (10 mg/kg; s) | 13.50 ± 3.024 (n = 3)  | 16.04 ± 2.604 (n = 5) | p = 0.9299            | 25.00 ± 2.536 (n = 3) | 30 ± 0.000 (n = 4)    | p = 0.5799            |

| Behavioural test                                             | GABA-CRBN-KO + Vehicle |                       | p (Males vs. Females) | GABA-CRBN-KO + THC    |                       | p (Males vs. Females) |
|--------------------------------------------------------------|------------------------|-----------------------|-----------------------|-----------------------|-----------------------|-----------------------|
|                                                              | Males mean ± SEM       | Females mean ± SEM    |                       | Males mean ± SEM      | Females mean ± SEM    |                       |
| Time immobile in the catalepsy test (3 mg/kg; s)             | 0.500 ± 0.500 (n = 4)  | 4.200 ± 1.319 (n = 5) | p = 0.3135            | 1.750 ± 1.181 (n = 4) | 6.200 ± 1.625 (n = 5) | p = 0.1642            |
| Latency to pain symptoms in the hot plate test (3 mg/kg; s)  | 18.58 ± 2.262 (n = 4)  | 15.12 ± 0.832 (n = 5) | p = 0.5199            | 21.13 ± 2.652 (n = 4) | 17.88 ± 0.786 (n = 5) | p = 0.5779            |
| Time immobile in the catalepsy test (10 mg/kg; s)            | 1.000 ± 1.000 (n = 4)  | 3.250 ± 1.250 (n = 4) | p = 0.9990            | 52.00 ± 8.000 (n = 4) | 36.00 ± 11.34 (n = 5) | p = 0.3444            |
| Latency to pain symptoms in the hot plate test (10 mg/kg; s) | 12.55 ± 2.344 (n = 4)  | 16.20 ± 1.179 (n = 4) | p = 0.7648            | 27.40 ± 2.600 (n = 4) | 23.36 ± 3.047 (n = 5) | p = 0.6518            |

p values were obtained by one-way ANOVA with Tukey's post-hoc test (Figs 2 and EV2) or by two-way ANOVA with Sidak's post-hoc test (Fig 5)
