# Supplementary material for: The CB1 receptor interacts with cereblon and drives cereblon deficiency-associated memory shortfalls
Source: PubMed Central journal article supplement (PMC11018632; doi:10.1038/s44321-024-00054-w), 2024-03-21
Supplement: 44321_2024_54_MOESM10_ESM.pdf [file 44321_2024_54_MOESM10_ESM.pdf]

## Expanded View Figures

**Figure EV1. Additional characterization of the conditional CRBN knockout mouse lines.**

(A) Representative images and fluorescent signal quantification of RNAscope in situ hybridization labelling in the striatum of CRBN-WT ( $n = 6$ ), Glu-CRBN-KO ( $n = 5$ ), GABA-CRBN-KO ( $n = 4$ ) and CRBN-KO ( $n = 3$ ) mice (mean  $\pm$  SEM). Circles, male mice; triangles, female mice.  $p$  values were obtained by one-way ANOVA with Dunnett's post hoc test. (B) Representative images and fluorescent signal quantification of RNAscope in situ hybridization labelling in the cerebellum of CRBN-WT ( $n = 6$ ), Glu-CRBN-KO ( $n = 5$ ), GABA-CRBN-KO ( $n = 3$ ) and CRBN-KO ( $n = 3$ ) mice (mean  $\pm$  SEM). Circles, male mice; triangles, female mice.  $p$  values were obtained by one-way ANOVA with Dunnett's post hoc test. (C) *Crbn* mRNA levels (% of WT mice) as assessed by q-PCR in the striatum or cerebellum of CRBN-WT, CRBN-KO, Glu-CRBN-WT, Glu-CRBN-KO, GABA-CRBN-WT and GABA-CRBN-KO mice ( $n = 3$  animals per group; mean  $\pm$  SEM). Circles, male mice; triangles, female mice.  $p$  values were obtained by unpaired two-tailed Student's  $t$  test. (D) CRBN protein levels (% of WT mice) as assessed by western blotting in the striatum or cerebellum of CRBN-WT, CRBN-KO, Glu-CRBN-WT, Glu-CRBN-KO, GABA-CRBN-WT and GABA-CRBN-KO mice ( $n = 6-8$  animals per group; mean  $\pm$  SEM). Circles, male mice; triangles, female mice.  $p$  values were obtained by unpaired two-tailed Student's  $t$  test. Source data are available online for this figure.

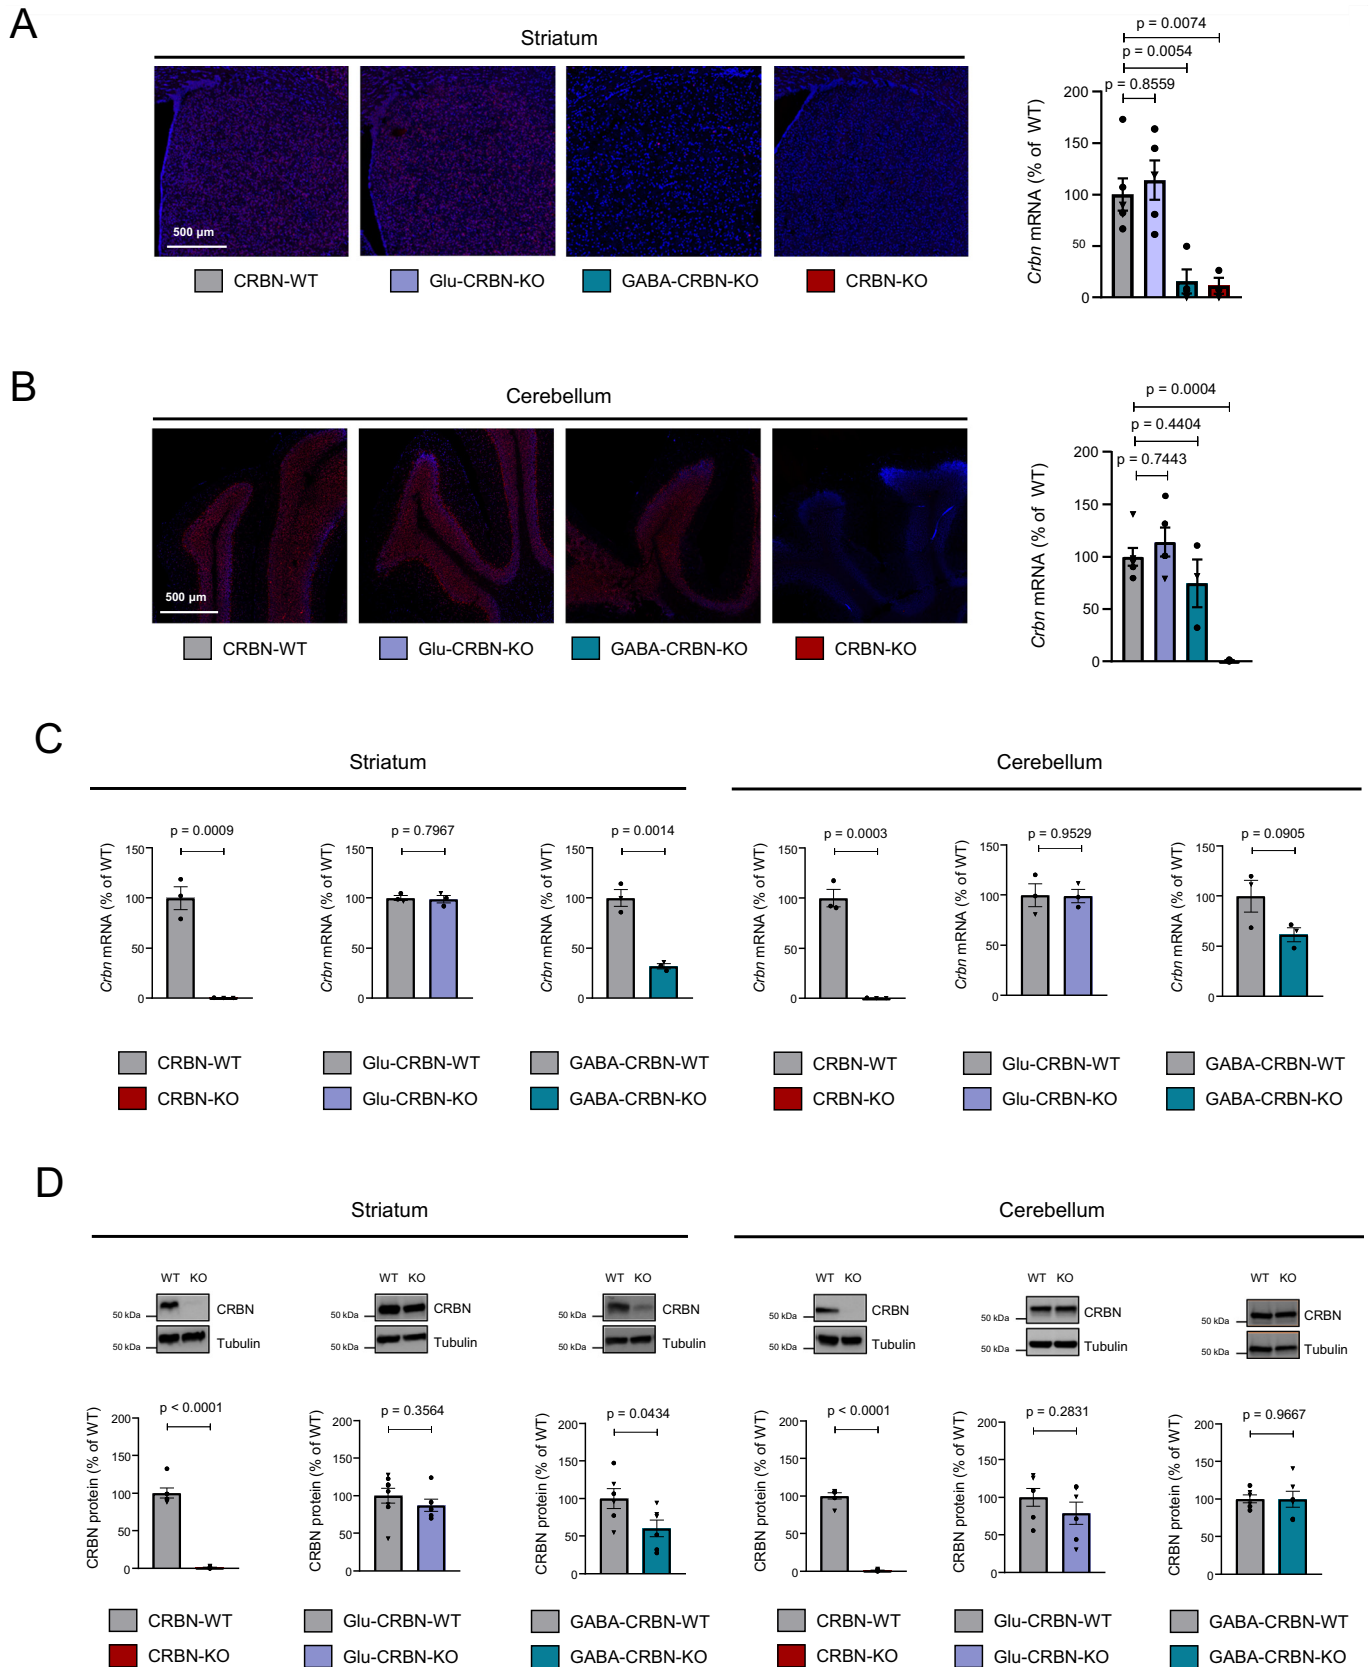

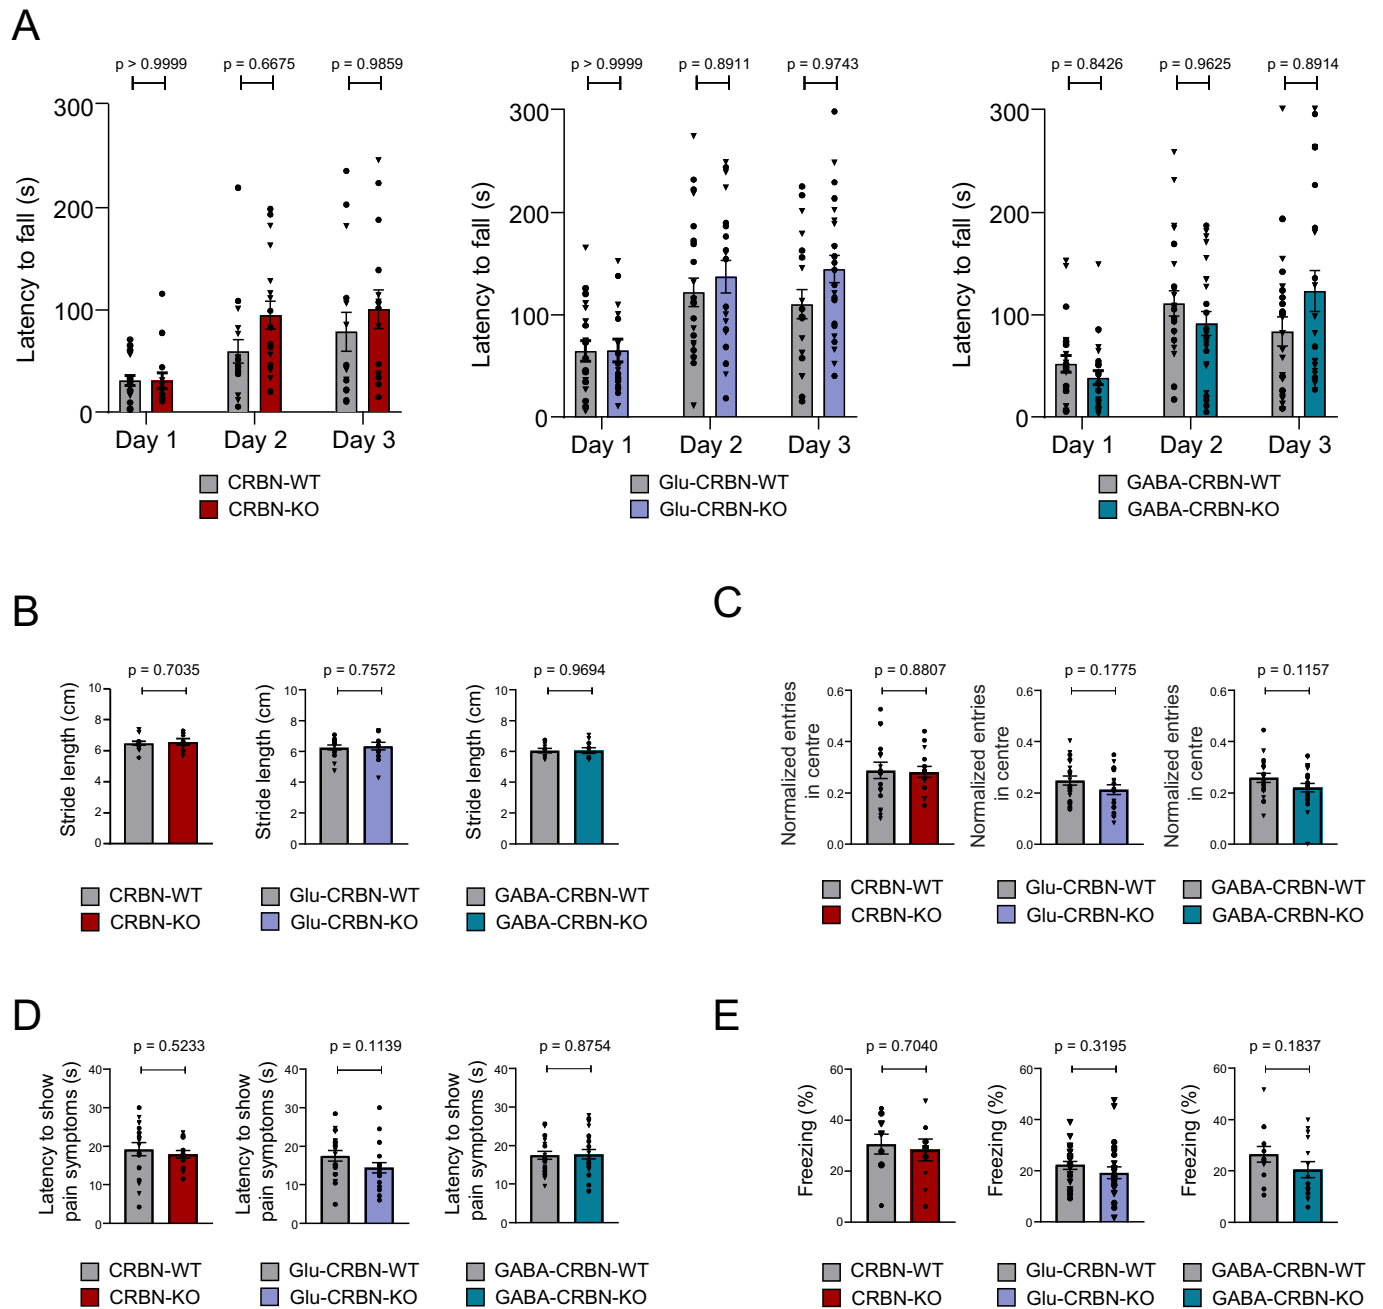

**Figure EV2. Additional behavioural phenotyping of the CRBN knockout mouse lines.**

(A) Motor learning in the rotarod test (mean time to fall from the apparatus on day 1, 2 or 3; in s). CRBN-WT ( $n = 18$ ), CRBN-KO ( $n = 15$ ), Glu-CRBN-WT ( $n = 20$ ), Glu-CRBN-KO ( $n = 24$ ), GABA-CRBN-WT ( $n = 24$ ), GABA-CRBN-KO ( $n = 24$ ) mice (mean  $\pm$  SEM). Circles, male mice; triangles, female mice.  $p$  values were obtained by two-way ANOVA with Sidak's post hoc test. (B) Stride length (in cm) in the footprint test. CRBN-WT ( $n = 13$ ), CRBN-KO ( $n = 8$ ), Glu-CRBN-WT ( $n = 17$ ), Glu-CRBN-KO ( $n = 13$ ), GABA-CRBN-WT ( $n = 9$ ), GABA-CRBN-KO ( $n = 11$ ) mice (mean  $\pm$  SEM). Circles, male mice; triangles, female mice.  $p$  values were obtained by unpaired two-tailed Student's  $t$  test. (C) Entries in the central part of an open field arena (normalized to total ambulation). CRBN-WT ( $n = 18$ ), CRBN-KO ( $n = 15$ ), Glu-CRBN-WT ( $n = 20$ ), Glu-CRBN-KO ( $n = 19$ ), GABA-CRBN-WT ( $n = 19$ ), GABA-CRBN-KO ( $n = 24$ ) mice (mean  $\pm$  SEM). Circles, male mice; triangles, female mice.  $p$  values were obtained by unpaired two-tailed Student's  $t$  test. (D) Time to show pain symptoms (in s) in the hot plate test. CRBN-WT ( $n = 18$ ), CRBN-KO ( $n = 15$ ), Glu-CRBN-WT ( $n = 20$ ), Glu-CRBN-KO ( $n = 19$ ), GABA-CRBN-WT ( $n = 21$ ), GABA-CRBN-KO ( $n = 24$ ) mice (mean  $\pm$  SEM). Circles, male mice; triangles, female mice.  $p$  values were obtained by unpaired two-tailed Student's  $t$  test. (E) Time (in %) spent freezing in the conditioning session of the fear conditioning protocol. CRBN-WT ( $n = 10$ ), CRBN-KO ( $n = 10$ ), Glu-CRBN-WT ( $n = 24$ ), Glu-CRBN-KO ( $n = 24$ ), GABA-CRBN-WT ( $n = 13$ ), GABA-CRBN-KO ( $n = 14$ ) mice (mean  $\pm$  SEM). Circles, male mice; triangles, female mice.  $p$  values were obtained by unpaired two-tailed Student's  $t$  test. Source data are available online for this figure.

A

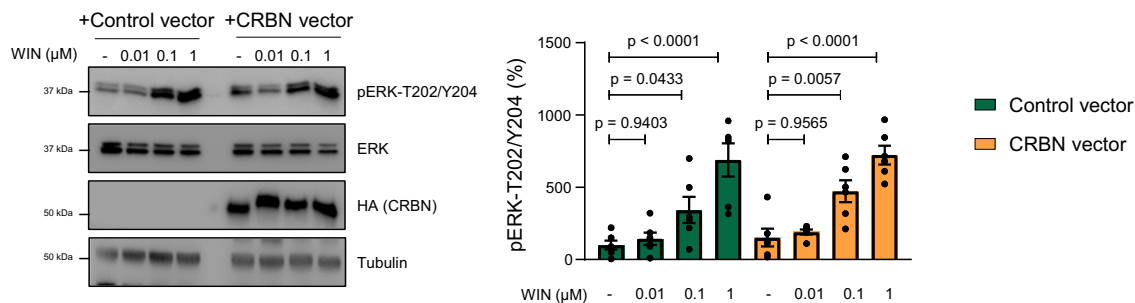

B

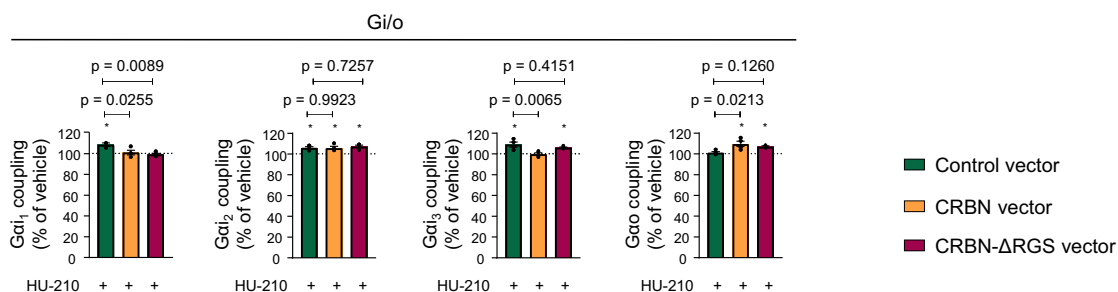

C

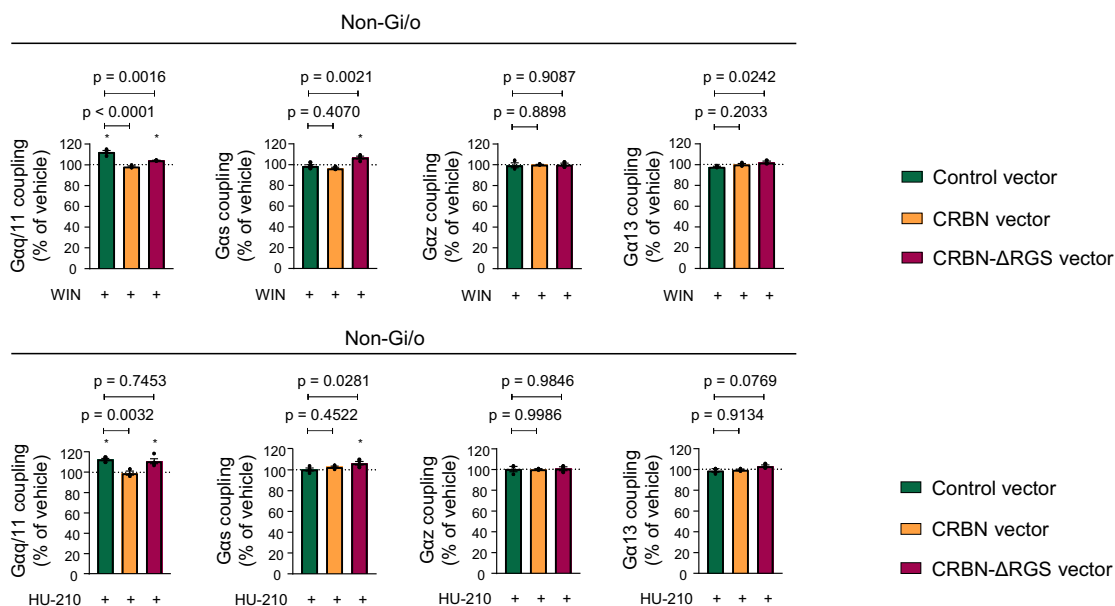

D

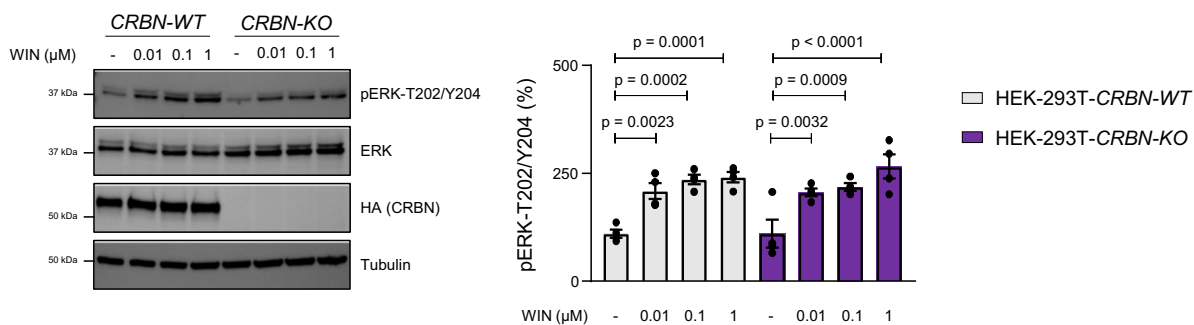

**◀ Figure EV3. Additional data on the CRBN-mediated inhibition of CB<sub>1</sub>R-evoked G<sub>i/o</sub> protein signalling in vitro.**

(A) HEK-293T cells expressing CB<sub>1</sub>R, together or not with CRBN, were incubated for 10 min with vehicle or WIN55,212-2 (doses ranging from 0.01 to 1 μM), and cell extracts were blotted for ERK phosphorylation (mean ± SEM). A representative experiment is shown. *p* values were obtained by two-way ANOVA with Dunnett's multiple comparisons test (*n* = 6 independent experiments). (B) Coupling of CB<sub>1</sub>R to G<sub>α<sub>i/o</sub></sub> proteins in membrane extracts from HEK-293T cells expressing CB<sub>1</sub>R, together or not with CRBN or CRBN-ΔRGS, after HU-210 stimulation (10 μM) (mean ± SEM). \**p* < 0.05 from basal (dashed line) by one-sample Student's *t* test. *p* values between constructs were obtained by one-way ANOVA with Dunnett's multiple comparisons test (*n* = 3–4 independent experiments). (C) Coupling of CB<sub>1</sub>R to non-G<sub>α<sub>i/o</sub></sub> proteins in membrane extracts from HEK-293T cells expressing CB<sub>1</sub>R, together or not with CRBN or CRBN-ΔRGS, after WIN55,212-2 stimulation (10 μM) (mean ± SEM). \**p* < 0.05 from basal (dashed line) by one-sample Student's *t* test. *p* values between constructs were obtained by one-way ANOVA with Dunnett's multiple comparisons test (*n* = 3–4 independent experiments). (D) HEK-293T-CRBN-WT and HEK-293T-CRBN-KO cells expressing CB<sub>1</sub>R were incubated for 10 min with vehicle or WIN55,212-2 (doses ranging from 0.01 to 1 μM), and cell extracts were blotted for ERK phosphorylation (mean ± SEM). A representative experiment is shown. *p* values were obtained by two-way ANOVA with Dunnett's multiple comparisons test (*n* = 4 independent experiments). Source data are available online for this figure.

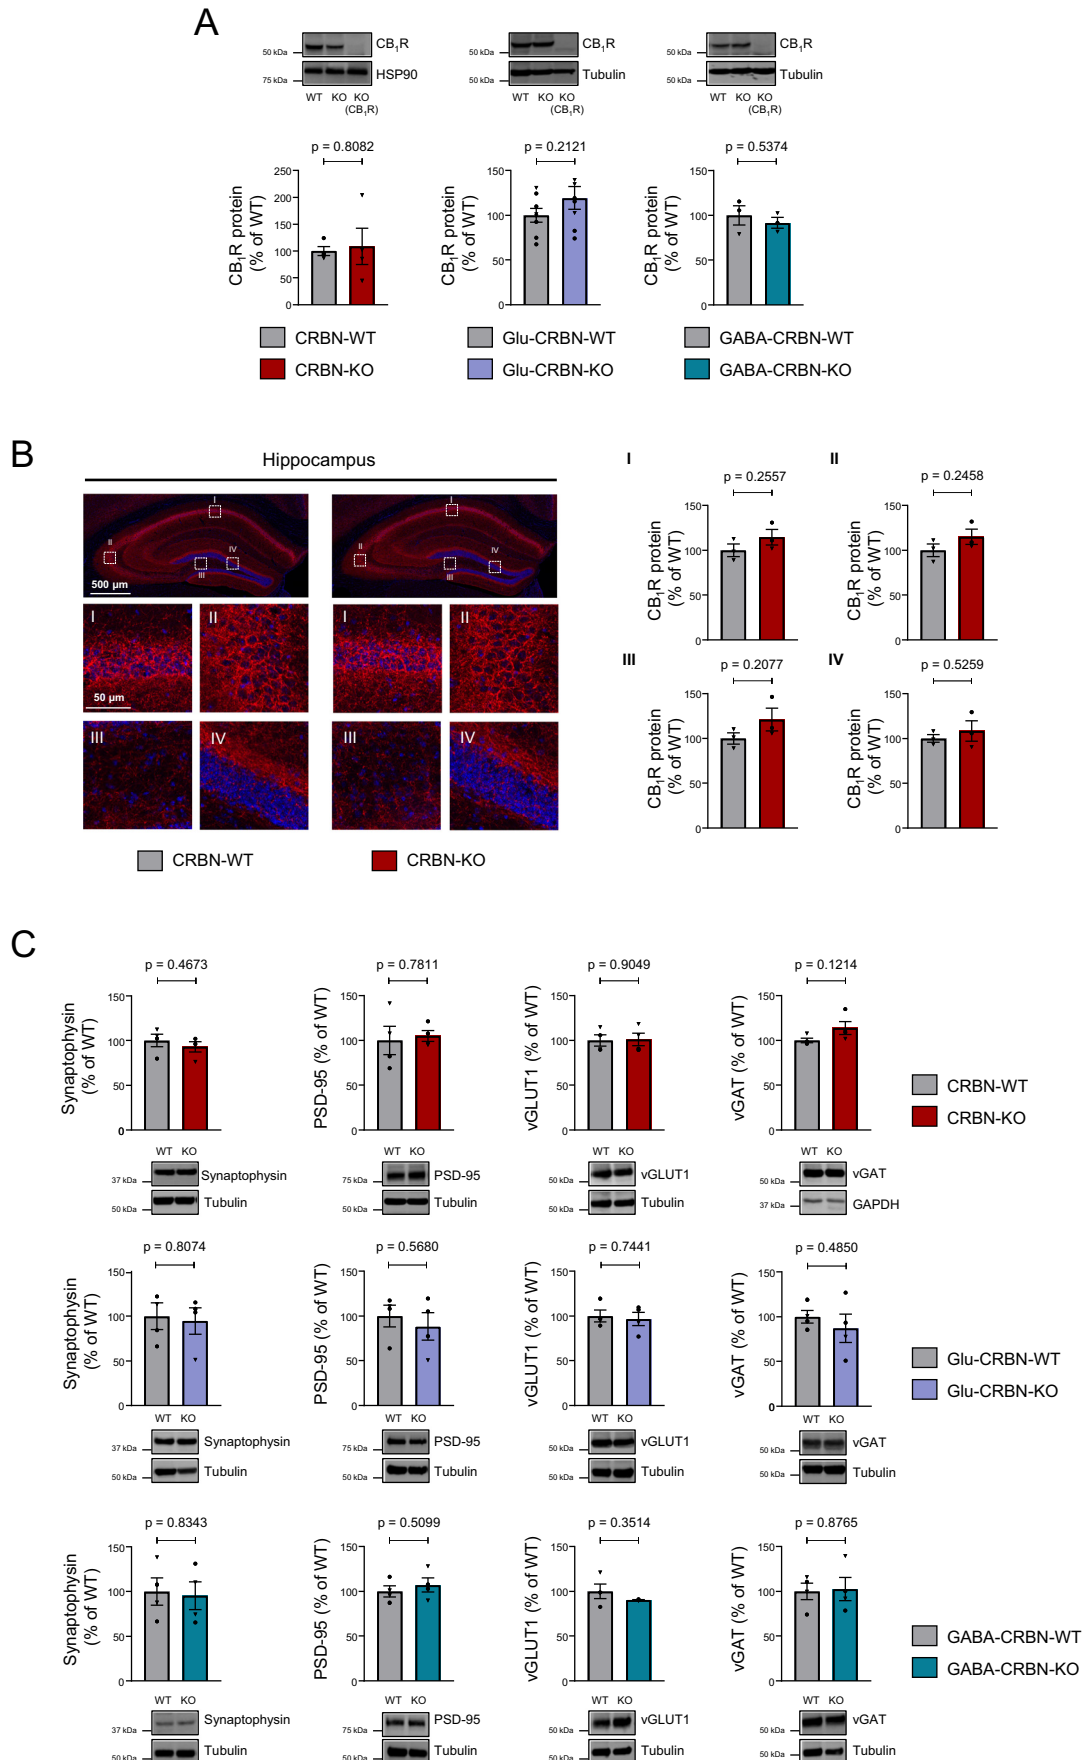

**◀ Figure EV4. *Crbn* deletion does not alter the levels of CB<sub>1</sub>R and synapse-marker proteins in the mouse hippocampus.**

(A) CB<sub>1</sub>R protein levels (% of WT mice) as assessed by western blotting in the hippocampus of CRBN-WT ( $n = 4$ ), CRBN-KO ( $n = 4$ ), Glu-CRBN-WT ( $n = 8$ ), Glu-CRBN-KO ( $n = 8$ ), GABA-CRBN-WT ( $n = 3$ ) or GABA-CRBN-KO ( $n = 3$ ) mice (mean  $\pm$  SEM). Circles, male mice; triangles, female mice.  $p$  values were obtained by unpaired two-tailed Student's  $t$  test. (B) CB<sub>1</sub>R immunoreactivity (% of WT mice) in the hippocampus of CRBN-WT and CRBN-KO mice ( $n = 3$  animals per group). High magnification images of CA1 (I), CA3 (II), hilus (III) and granule cell layer of the dentate gyrus (IV) are shown (mean  $\pm$  SEM). Circles, male mice; triangles, female mice.  $p$  values were obtained by unpaired two-tailed Student's  $t$  test. (C) Synaptophysin, PSD-95, vGLUT1 and vGAT protein levels (% of WT mice) as assessed by western blotting in the hippocampus of CRBN-WT, CRBN-KO, Glu-CRBN-WT, Glu-CRBN-KO, GABA-CRBN-WT or GABA-CRBN-KO mice ( $n = 3$ -4 animals per group; mean  $\pm$  SEM). Circles, male mice; triangles, female mice.  $p$  values were obtained by unpaired two-tailed Student's  $t$  test. Source data are available online for this figure.
